# Supplementary material for: The Lysophospholipase PNPLA7 Controls Hepatic Choline and Methionine Metabolism
Source: MDPI journal article supplement (doi:10.3390/biom13030471), 2023-03-03
Supplement: s1 [file s1]

**Table S1.****Gender, age, and disease stages of HCC patients (related to Figure 6).**

S, non-tumor; C, tumor.

|    | Sample mark (mRNA) | Fibrosis stage | HBV or HCV | Gender | Age |
|----|--------------------|----------------|------------|--------|-----|
| 1  | S2, C2             | F3             | nB, nC     | M      | 65  |
| 2  | S3, C3             | F4             | nB, nC     | M      | 63  |
| 3  | S4, C4             | F1             | nB, nC     | M      | 73  |
| 4  | S5, C5             | F2             | C          | M      | 53  |
| 5  | S6, C6             | F4             | C          | M      | 63  |
| 6  | S7, C7             | F3             | C          | M      | 59  |
| 7  | S8, C8             | F4             | C          | M      | 60  |
| 8  | S9, C9             | F2             | nB, nC     | F      | 73  |
| 9  | S10, C10           | F4             | C          | M      | 63  |
| 10 | S11, C11           | F4             | C          | F      | 72  |
| 11 | S12, C12           | F1             | C          | M      | 78  |
| 12 | S15, C15           | F1             | nB, nC     | M      | 58  |
| 13 | S16, C16           | F1             | nB, nC     | M      | 69  |
| 14 | S18, C18           | F3             | nB, nC     | F      | 67  |
| 15 | S19, C19           | F4             | nB, nC     | M      | 76  |
| 16 | S20, C20           | F4             | B, C       | F      | 78  |
| 17 | S21, C21           | F4             | C          | F      | 70  |
| 18 | S22, C22           | F3             | nB, nC     | M      | 69  |
| 19 | S23, C23           | F2             | C          | M      | 84  |
| 20 | S24, C24           | F3             | C          | M      | 76  |
| 21 | S25, C25           | F2             | C          | M      | 67  |
| 22 | S26, C26           | F4             | nB, nC     | F      | 75  |
| 23 | S27, C27           | F2             | B          | M      | 57  |
| 24 | S28, C28           | F3             | B          | F      | 60  |
| 25 | S29, C29           | F4             | nB, nC     | M      | 64  |
| 26 | S30, C30           | F2             | B          | M      | 71  |
| 27 | S31, C31           | F3             | C          | M      | 83  |
| 28 | S34, C34           | F4             | C          | M      | 66  |
| 29 | S35, C35           | F1             | B          | M      | 76  |
| 30 | S36, C36           | F1             | nB, nC     | M      | 65  |
| 31 | S37, C37           | F4             | nB, nC     | M      | 75  |
| 32 | S40, C40           | F2             | C          | M      | 54  |
| 33 | S41, C41           | F4             | C          | F      | 80  |
| 34 | S42, C42           | F0             | nB, nC     | F      | 66  |
| 35 | S43, C43           | F3             | B          | M      | 66  |
| 36 | S44, C44           | F4             | C          | M      | 70  |

|    |          |    |              |   |    |
|----|----------|----|--------------|---|----|
| 37 | S46, C46 | F4 | B            | M | 65 |
| 38 | S47, C47 | F3 | B            | M | 55 |
| 39 | S48, C48 | F0 | nB, nC       | M | 64 |
| 40 | S49, C49 | F0 | nB, nC       | M | 87 |
| 41 | S51, C51 | F4 | C            | F | 71 |
| 42 | S53, C53 | F4 | nB, nC       | M | 72 |
| 43 | S54, C54 | F0 | nB, nC       | M | 78 |
| 44 | S55, C55 | F2 | nB, nC       | M | 76 |
| 45 | S57, C57 | F3 | C            | M | 64 |
| 46 | S59, C59 | F2 | C            | M | 78 |
| 47 | S60, C60 | F4 | C            | F | 66 |
| 48 | S61, C61 | F3 | B (HBsAg+/-) | M | 71 |
| 49 | S62, C62 | F3 | nB, nC       | M | 71 |
| 50 | S63, C63 | F0 | nB, nC       | M | 73 |
| 51 | S64, C64 | F0 | nB, nC       | M | 67 |
| 52 | S65, C65 | F2 | B            | M | 72 |
| 53 | S66, C66 | F3 | nB, nC       | M | 71 |
| 54 | S67, C67 | F1 | C            | M | 65 |
| 55 | S68, C68 | F4 | nB, nC       | M | 64 |
| 56 | S69, C69 | F3 | C            | F | 80 |
| 57 | S70, C70 | F3 | nB, nC       | M | 68 |
| 58 | S71, C71 | F3 | B            | F | 58 |
| 59 | S72, C72 | F4 | C            | F | 72 |
| 60 | S73, C73 | F3 | C            | F | 80 |
| 61 | S74, C74 | F3 | nB, nC       | M | 71 |
| 62 | S75, C75 | F4 | C            | M | 73 |
| 63 | S77, C77 | F1 | C            | F | 77 |
| 64 | S78, C78 | F3 | C            | M | 79 |
| 65 | S79, C79 | F3 | nB, nC       | M | 68 |
